# Supplementary material for: Distinct Body Fat Distribution and Its Association with Metabolic Syndrome in Tibetan Population
Source: Research Square preprint supplement (doi:10.21203/rs.3.rs-7335258/v1), 2025-08-27
Supplement: Supplementary file 1 [file 8ce5f87f64be0a9f0bfe6b5a.xlsx]

## Sheet: Figure S1
Figure S1. Box plot illustrating distribution differences among different ethnic/racial groups along PC1 and PC2 dimensions.

## Sheet: Table S1
Table S1. Results of Mental Tests on body fat across different ethnic/racial groups.
spec	env	r	p.value	rd	pd
Mexican.American	Android fat mass	0.0457268	0.007	< 0.2	0.001-0.05
Mexican.American	Gynoid fat mass	0.0433661	0.014	< 0.2	0.001-0.05
Mexican.American	Head Fat	0.0304139	0.051	< 0.2	>= 0.05
Mexican.American	Left Arm Fat	0.0344877	0.051	< 0.2	>= 0.05
Mexican.American	Right Arm Fat	0.027598	0.086	< 0.2	>= 0.05
Mexican.American	Trunk Fat	0.0472885	0.005	< 0.2	0.001-0.05
Mexican.American	Left Leg Fat	0.054688	0.005	< 0.2	0.001-0.05
Mexican.American	Right Leg Fat	0.0543573	0.008	< 0.2	0.001-0.05
Mexican.American	Total Fat	0.0479702	0.011	< 0.2	0.001-0.05
Non.Hispanic.Asian.	Android fat mass	0.0168307	0.179	< 0.2	>= 0.05
Non.Hispanic.Asian.	Gynoid fat mass	0.0356059	0.029	< 0.2	0.001-0.05
Non.Hispanic.Asian.	Head Fat	-0.0002668	0.49	< 0.2	>= 0.05
Non.Hispanic.Asian.	Left Arm Fat	0.00600838	0.367	< 0.2	>= 0.05
Non.Hispanic.Asian.	Right Arm Fat	0.00510341	0.381	< 0.2	>= 0.05
Non.Hispanic.Asian.	Trunk Fat	0.0235835	0.093	< 0.2	>= 0.05
Non.Hispanic.Asian.	Left Leg Fat	0.0334884	0.038	< 0.2	0.001-0.05
Non.Hispanic.Asian.	Right Leg Fat	0.0347433	0.029	< 0.2	0.001-0.05
Non.Hispanic.Asian.	Total Fat	0.0216881	0.125	< 0.2	>= 0.05
Non.Hispanic.Black.	Android fat mass	0.0350466	0.03	< 0.2	0.001-0.05
Non.Hispanic.Black.	Gynoid fat mass	0.0528864	0.006	< 0.2	0.001-0.05
Non.Hispanic.Black.	Head Fat	0.00178381	0.465	< 0.2	>= 0.05
Non.Hispanic.Black.	Left Arm Fat	0.0545602	0.004	< 0.2	0.001-0.05
Non.Hispanic.Black.	Right Arm Fat	0.052855	0.006	< 0.2	0.001-0.05
Non.Hispanic.Black.	Trunk Fat	0.0487039	0.007	< 0.2	0.001-0.05
Non.Hispanic.Black.	Left Leg Fat	0.0606232	0.003	< 0.2	0.001-0.05
Non.Hispanic.Black.	Right Leg Fat	0.0580023	0.003	< 0.2	0.001-0.05
Non.Hispanic.Black.	Total Fat	0.0591692	0.002	< 0.2	0.001-0.05
Non.Hispanic.Other.	Android fat mass	0.0328202	0.044	< 0.2	0.001-0.05
Non.Hispanic.Other.	Gynoid fat mass	0.0369069	0.044	< 0.2	0.001-0.05
Non.Hispanic.Other.	Head Fat	-0.00550925	0.637	< 0.2	>= 0.05
Non.Hispanic.Other.	Left Arm Fat	-0.00733544	0.594	< 0.2	>= 0.05
Non.Hispanic.Other.	Right Arm Fat	-0.0142418	0.726	< 0.2	>= 0.05
Non.Hispanic.Other.	Trunk Fat	0.0283814	0.064	< 0.2	>= 0.05
Non.Hispanic.Other.	Left Leg Fat	0.0323318	0.051	< 0.2	>= 0.05
Non.Hispanic.Other.	Right Leg Fat	0.0304864	0.072	< 0.2	>= 0.05
Non.Hispanic.Other.	Total Fat	0.0251559	0.09	< 0.2	>= 0.05
Non.Hispanic.White.	Android fat mass	-0.00870765	0.712	< 0.2	>= 0.05
Non.Hispanic.White.	Gynoid fat mass	0.00911821	0.262	< 0.2	>= 0.05
Non.Hispanic.White.	Head Fat	0.00911792	0.263	< 0.2	>= 0.05
Non.Hispanic.White.	Left Arm Fat	-0.0199648	0.876	< 0.2	>= 0.05
Non.Hispanic.White.	Right Arm Fat	-0.0254009	0.937	< 0.2	>= 0.05
Non.Hispanic.White.	Trunk Fat	-0.0131288	0.796	< 0.2	>= 0.05
Non.Hispanic.White.	Left Leg Fat	0.00880934	0.275	< 0.2	>= 0.05
Non.Hispanic.White.	Right Leg Fat	0.00998892	0.251	< 0.2	>= 0.05
Non.Hispanic.White.	Total Fat	-0.00937369	0.721	< 0.2	>= 0.05
Other.Hispanic	Android fat mass	0.0317873	0.055	< 0.2	>= 0.05
Other.Hispanic	Gynoid fat mass	0.0583811	0.004	< 0.2	0.001-0.05
Other.Hispanic	Head Fat	0.00970238	0.274	< 0.2	>= 0.05
Other.Hispanic	Left Arm Fat	0.0410006	0.024	< 0.2	0.001-0.05
Other.Hispanic	Right Arm Fat	0.0366467	0.039	< 0.2	0.001-0.05
Other.Hispanic	Trunk Fat	0.0371552	0.03	< 0.2	0.001-0.05
Other.Hispanic	Left Leg Fat	0.0548717	0.008	< 0.2	0.001-0.05
Other.Hispanic	Right Leg Fat	0.0596372	0.003	< 0.2	0.001-0.05
Other.Hispanic	Total Fat	0.0489898	0.008	< 0.2	0.001-0.05
Tibetan	Android fat mass	0.0019556	0.021	< 0.2	0.001-0.05
Tibetan	Gynoid fat mass	0.021541	0.001	< 0.2	< 0.001
Tibetan	Head Fat	0.0178765	0.001	< 0.2	< 0.001
Tibetan	Left Arm Fat	0.00155129	0.029	< 0.2	0.001-0.05
Tibetan	Right Arm Fat	0.000601766	0.117	< 0.2	>= 0.05
Tibetan	Trunk Fat	0.00245576	0.008	< 0.2	0.001-0.05
Tibetan	Left Leg Fat	0.0144169	0.001	< 0.2	< 0.001
Tibetan	Right Leg Fat	0.0217366	0.001	< 0.2	< 0.001
Tibetan	Total Fat	0.00566115	0.001	< 0.2	< 0.001

## Sheet: Table S2
Table S2. Baseline characteristics of the Tibetan population by metabolic syndrome (MetS) and non-metabolic syndrome (Non-MetS) groups.
Variable		Non-MetS(n=578)	MetS(n=162)	P
sex (%)	Men	228 (39.4)	94 (58.0)	<0.001
	Women	350 (60.6)	68 (42.0)
marital (%)	Unmarried	72 (12.6)	10 ( 6.2)	0.04
	Marital	479 (83.7)	141 (88.1)
	Others	21 ( 3.7)	9 ( 5.6)
Education (%)	No schooling	400 (84.0)	126 (88.7)	0.223
	<6 years of schooling	45 ( 9.5)	12 ( 8.5)
	≥6 years of schooling	31 ( 6.5)	4 ( 2.8)
Insurance (%)	Rural	375 (65.6)	108 (67.5)	0.924
	Urban insurance	186 (32.5)	49 (30.6)
	No insurance	11 ( 1.9)	3 ( 1.9)
Income (%)	<20,000	54 ( 9.4)	10 ( 6.2)	0.045
	20,000~100,000	259 (45.3)	90 (56.2)
	100,000~	259 (45.3)	60 (37.5)
Smoking (%)	Never	475 (83.0)	124 (77.5)	0.029
	Former smoker	15 ( 2.6)	6 ( 3.8)
	Current,<5cigarettes/d	18 ( 3.1)	1 ( 0.6)
	Current, 5cigarettes/d	64 (11.2)	29 (18.1)
Drinking (%)	Never	502 (87.8)	134 (83.8)	0.469
	Abstinence	13 ( 2.3)	6 ( 3.8)
	<40g/week	49 ( 8.6)	18 (11.2)
	≥40g/week	8 ( 1.4)	2 ( 1.2)
PA (%)	Light	335 (58.6)	102 (63.7)	0.515
	Moderate	181 (31.6)	45 (28.1)
	Heavy	56 ( 9.8)	13 ( 8.1)
Age (median [IQR])		43.00 [33.00, 51.00]	47.00 [40.25, 54.00]	<0.001
BMI (median [IQR])		25.47 [22.25, 28.85]	29.31 [26.80, 32.12]	<0.001
Trunk fat (median [IQR])		11536.29 [8213.47, 14736.69]	15123.42 [12857.68, 18069.11]	<0.001
Total fat (median [IQR])		23503.33 [17699.22, 29246.10]	28730.61 [24112.73, 33940.74]	<0.001

## Sheet: Table S3
Table S3. Regression analysis of lipoproteins and trunk fat percentage.
Y	X	b1	OR(95%CI)	P
z_ABHCR	Trunk fat/Weight	0.0084	1.0085 (1.0067 , 1.0103)	1.08558e-16
z_H1FC	Trunk fat/Weight	-0.0085	0.9915 (0.9897 , 0.9934)	1.998e-15
z_nHCHCR	Trunk fat/Weight	0.008	1.008 (1.0062 , 1.0098)	2.63902e-15
z_nH0CHp	Trunk fat/Weight	0.008	1.008 (1.0062 , 1.0098)	2.63902e-15
z_TGHCR	Trunk fat/Weight	0.0082	1.0082 (1.0063 , 1.0101)	3.79065e-15
z_CHHCR	Trunk fat/Weight	0.0079	1.0079 (1.0061 , 1.0098)	3.79065e-15
z_VLCHHCR	Trunk fat/Weight	0.0077	1.0077 (1.0059 , 1.0095)	1.98373e-14
z_ABA1R	Trunk fat/Weight	0.0078	1.0079 (1.006 , 1.0097)	3.28005e-14
z_VCHHCR	Trunk fat/Weight	0.0078	1.0078 (1.0059 , 1.0097)	6.401e-14
z_VIDPN	Trunk fat/Weight	0.0078	1.0078 (1.0059 , 1.0097)	7.88954e-14
z_VIDAB	Trunk fat/Weight	0.0078	1.0078 (1.0059 , 1.0097)	7.88954e-14
z_H0FC	Trunk fat/Weight	-0.008	0.9921 (0.9902 , 0.994)	7.88954e-14
z_TGPLR	Trunk fat/Weight	0.0079	1.0079 (1.006 , 1.0098)	7.88954e-14
z_L2PNp	Trunk fat/Weight	-0.0079	0.9921 (0.9902 , 0.994)	1.28681e-13
z_ICHHCR	Trunk fat/Weight	0.0076	1.0077 (1.0058 , 1.0096)	2.03352e-13
z_L5TG	Trunk fat/Weight	0.0077	1.0078 (1.0058 , 1.0097)	2.1645e-13
z_NAG12R	Trunk fat/Weight	0.0078	1.0079 (1.0059 , 1.0098)	3.25165e-13
z_H1A1	Trunk fat/Weight	-0.0076	0.9925 (0.9906 , 0.9943)	3.3855e-13
z_V0PN	Trunk fat/Weight	0.0076	1.0076 (1.0057 , 1.0096)	3.67965e-13
z_V0AB	Trunk fat/Weight	0.0076	1.0076 (1.0057 , 1.0096)	3.67965e-13
z_H1PL	Trunk fat/Weight	-0.0074	0.9927 (0.9908 , 0.9945)	3.91671e-13
z_V1PL	Trunk fat/Weight	0.0076	1.0076 (1.0057 , 1.0096)	7.37141e-13
z_V1FC	Trunk fat/Weight	0.0076	1.0076 (1.0057 , 1.0096)	9.22687e-13
z_H1CH	Trunk fat/Weight	-0.0074	0.9927 (0.9908 , 0.9945)	9.22687e-13
z_L6CEp	Trunk fat/Weight	0.0071	1.0071 (1.0053 , 1.009)	1.4652e-12
z_V1CH	Trunk fat/Weight	0.0074	1.0075 (1.0055 , 1.0094)	2.26933e-12
z_L6FCp	Trunk fat/Weight	-0.0073	0.9927 (0.9909 , 0.9946)	2.26933e-12
z_V1LP	Trunk fat/Weight	0.0074	1.0075 (1.0055 , 1.0094)	2.27154e-12
z_H1LP	Trunk fat/Weight	-0.0071	0.9929 (0.991 , 0.9947)	2.53769e-12
z_VIDFC	Trunk fat/Weight	0.0073	1.0073 (1.0054 , 1.0092)	3.5409e-12
z_V1TG	Trunk fat/Weight	0.0073	1.0073 (1.0054 , 1.0093)	4.41494e-12
z_AAA	Trunk fat/Weight	0.0075	1.0076 (1.0055 , 1.0096)	4.71403e-12
z_Glu	Trunk fat/Weight	0.0073	1.0073 (1.0054 , 1.0093)	4.94743e-12
z_VIDCH	Trunk fat/Weight	0.0072	1.0072 (1.0053 , 1.0092)	4.94743e-12
z_CHTGR	Trunk fat/Weight	-0.0073	0.9928 (0.9908 , 0.9947)	4.94743e-12
z_L0FCp	Trunk fat/Weight	-0.0075	0.9926 (0.9906 , 0.9945)	5.05975e-12
z_VILTG	Trunk fat/Weight	0.0073	1.0074 (1.0054 , 1.0093)	5.688e-12
z_H2CH	Trunk fat/Weight	-0.0069	0.9931 (0.9912 , 0.9949)	6.42339e-12
z_V1CE	Trunk fat/Weight	0.0072	1.0073 (1.0053 , 1.0092)	7.06985e-12
z_V0PL	Trunk fat/Weight	0.0072	1.0072 (1.0053 , 1.0092)	7.91707e-12
z_TG	Trunk fat/Weight	0.0072	1.0072 (1.0053 , 1.0092)	8.60927e-12
z_V0LP	Trunk fat/Weight	0.0072	1.0072 (1.0053 , 1.0092)	8.72143e-12
z_V0FC	Trunk fat/Weight	0.0071	1.0072 (1.0052 , 1.0091)	9.44791e-12
z_V0TG	Trunk fat/Weight	0.0072	1.0072 (1.0053 , 1.0092)	1.1428e-11
z_IDPN	Trunk fat/Weight	0.007	1.007 (1.0051 , 1.009)	1.54193e-11
z_V3FCp	Trunk fat/Weight	0.0071	1.0071 (1.0052 , 1.0091)	1.54193e-11
z_IDAB	Trunk fat/Weight	0.007	1.007 (1.0051 , 1.0089)	1.554e-11
z_VIDPL	Trunk fat/Weight	0.0071	1.0071 (1.0052 , 1.0091)	1.554e-11
z_BCAA	Trunk fat/Weight	0.0068	1.0068 (1.0049 , 1.0087)	1.59024e-11
z_Val	Trunk fat/Weight	0.0069	1.0069 (1.005 , 1.0088)	1.61172e-11
z_H2FC	Trunk fat/Weight	-0.0069	0.9931 (0.9912 , 0.995)	2.03718e-11
z_V0CH	Trunk fat/Weight	0.007	1.0071 (1.0051 , 1.009)	2.08765e-11
z_VIDTG	Trunk fat/Weight	0.0071	1.0071 (1.0051 , 1.0091)	2.99072e-11
z_H2CE	Trunk fat/Weight	-0.0067	0.9933 (0.9915 , 0.9952)	3.626e-11
z_IDLP	Trunk fat/Weight	0.007	1.007 (1.005 , 1.009)	4.43193e-11
z_H3FCp	Trunk fat/Weight	-0.0071	0.9929 (0.991 , 0.9949)	4.57875e-11
z_IDCE	Trunk fat/Weight	0.0068	1.0069 (1.0049 , 1.0088)	4.87232e-11
z_L3PNp	Trunk fat/Weight	-0.007	0.9931 (0.9911 , 0.995)	5.661e-11
z_L6TG	Trunk fat/Weight	0.007	1.007 (1.005 , 1.009)	6.03915e-11
z_H1CE	Trunk fat/Weight	-0.0066	0.9934 (0.9915 , 0.9952)	6.771e-11
z_IDPLp	Trunk fat/Weight	-0.0068	0.9932 (0.9913 , 0.9952)	7.26049e-11
z_IDCH	Trunk fat/Weight	0.0068	1.0068 (1.0049 , 1.0087)	7.29429e-11
z_V0CE	Trunk fat/Weight	0.0069	1.0069 (1.0049 , 1.0088)	7.29429e-11
z_L5CE	Trunk fat/Weight	0.0066	1.0067 (1.0047 , 1.0086)	8.76046e-11
z_LHCR	Trunk fat/Weight	0.0065	1.0066 (1.0047 , 1.0084)	8.76046e-11
z_H4FCp	Trunk fat/Weight	-0.0068	0.9932 (0.9913 , 0.9952)	9.48545e-11
z_Gln	Trunk fat/Weight	-0.007	0.993 (0.991 , 0.995)	1.332e-10
z_MUFAp	Trunk fat/Weight	0.0067	1.0068 (1.0048 , 1.0087)	1.61113e-10
z_IDFC	Trunk fat/Weight	0.0066	1.0067 (1.0047 , 1.0086)	1.62639e-10
z_H0CH	Trunk fat/Weight	-0.0066	0.9934 (0.9915 , 0.9953)	1.67438e-10
z_UPUR	Trunk fat/Weight	0.0067	1.0067 (1.0047 , 1.0086)	1.67438e-10
z_L5LP	Trunk fat/Weight	0.0066	1.0066 (1.0047 , 1.0085)	1.74363e-10
z_L6PLp	Trunk fat/Weight	-0.0066	0.9934 (0.9915 , 0.9953)	1.8201e-10
z_Tyr	Trunk fat/Weight	0.0069	1.007 (1.0049 , 1.009)	2.2185e-10
z_L5PN	Trunk fat/Weight	0.0065	1.0065 (1.0046 , 1.0084)	2.57076e-10
z_L5AB	Trunk fat/Weight	0.0065	1.0065 (1.0046 , 1.0084)	2.58513e-10
z_MUPUR	Trunk fat/Weight	0.0066	1.0066 (1.0047 , 1.0086)	2.78077e-10
z_VILPN	Trunk fat/Weight	0.0065	1.0065 (1.0046 , 1.0085)	2.80062e-10
z_VILAB	Trunk fat/Weight	0.0065	1.0065 (1.0046 , 1.0085)	2.82418e-10
z_ApoB	Trunk fat/Weight	0.0065	1.0065 (1.0046 , 1.0084)	2.85311e-10
z_ABPN	Trunk fat/Weight	0.0065	1.0065 (1.0046 , 1.0084)	2.85311e-10
z_V2FC	Trunk fat/Weight	0.0066	1.0067 (1.0047 , 1.0086)	3.06198e-10
z_H1A2	Trunk fat/Weight	-0.0065	0.9935 (0.9916 , 0.9955)	3.7633e-10
z_L1PLp	Trunk fat/Weight	-0.0064	0.9936 (0.9917 , 0.9955)	5.70857e-10
z_H0LP	Trunk fat/Weight	-0.0063	0.9937 (0.9918 , 0.9956)	5.994e-10
z_IDTG	Trunk fat/Weight	0.0066	1.0066 (1.0046 , 1.0086)	6.04759e-10
z_H2LP	Trunk fat/Weight	-0.0062	0.9938 (0.992 , 0.9957)	6.04759e-10
z_VILPL	Trunk fat/Weight	0.0064	1.0065 (1.0045 , 1.0084)	6.4708e-10
z_L5CH	Trunk fat/Weight	0.0063	1.0064 (1.0044 , 1.0083)	6.47292e-10
z_H3FC	Trunk fat/Weight	-0.0063	0.9937 (0.9918 , 0.9956)	7.733e-10
z_H0PL	Trunk fat/Weight	-0.0062	0.9939 (0.992 , 0.9957)	9.40451e-10
z_L5PL	Trunk fat/Weight	0.0063	1.0063 (1.0044 , 1.0082)	1.00986e-09
z_L6CE	Trunk fat/Weight	0.0064	1.0064 (1.0044 , 1.0084)	1.18519e-09
z_V2CH	Trunk fat/Weight	0.0064	1.0064 (1.0044 , 1.0084)	1.43828e-09
z_L6PN	Trunk fat/Weight	0.0063	1.0064 (1.0044 , 1.0083)	1.48974e-09
z_L6AB	Trunk fat/Weight	0.0063	1.0064 (1.0044 , 1.0083)	1.49156e-09
z_UFAp	Trunk fat/Weight	0.0065	1.0066 (1.0045 , 1.0086)	1.90626e-09
z_SFAp	Trunk fat/Weight	-0.0065	0.9935 (0.9915 , 0.9955)	1.90626e-09
z_L0TG	Trunk fat/Weight	0.0064	1.0064 (1.0044 , 1.0084)	1.91391e-09
z_V2PL	Trunk fat/Weight	0.0064	1.0064 (1.0044 , 1.0084)	2.49585e-09
z_H2PL	Trunk fat/Weight	-0.0059	0.9941 (0.9922 , 0.9959)	2.49585e-09
z_V2LP	Trunk fat/Weight	0.0063	1.0064 (1.0044 , 1.0084)	3.17656e-09
z_IDPL	Trunk fat/Weight	0.0062	1.0062 (1.0042 , 1.0082)	4.84951e-09
z_V2TG	Trunk fat/Weight	0.0063	1.0063 (1.0043 , 1.0083)	5.34721e-09
z_V3FC	Trunk fat/Weight	0.0062	1.0062 (1.0042 , 1.0083)	5.86714e-09
z_V2CE	Trunk fat/Weight	0.0061	1.0061 (1.0041 , 1.0081)	1.20948e-08
z_L6LP	Trunk fat/Weight	0.006	1.006 (1.004 , 1.008)	1.64633e-08
z_V4PL	Trunk fat/Weight	0.0059	1.0059 (1.004 , 1.0079)	1.80992e-08
z_Phe	Trunk fat/Weight	0.0061	1.0061 (1.0041 , 1.0081)	2.29739e-08
z_H0CE	Trunk fat/Weight	-0.0058	0.9942 (0.9923 , 0.9961)	2.34916e-08
z_L1TGp	Trunk fat/Weight	0.006	1.006 (1.004 , 1.008)	2.616e-08
z_L6CH	Trunk fat/Weight	0.0059	1.0059 (1.0039 , 1.0079)	3.30027e-08
z_L4TG	Trunk fat/Weight	0.0059	1.006 (1.0039 , 1.008)	4.09619e-08
z_V4FC	Trunk fat/Weight	0.0058	1.0058 (1.0038 , 1.0078)	4.81974e-08
z_Leu	Trunk fat/Weight	0.0055	1.0055 (1.0036 , 1.0075)	5.09635e-08
z_L5FCp	Trunk fat/Weight	-0.0057	0.9944 (0.9924 , 0.9963)	5.16724e-08
z_L5PNp	Trunk fat/Weight	0.0057	1.0057 (1.0037 , 1.0077)	6.91615e-08
z_L6PL	Trunk fat/Weight	0.0057	1.0058 (1.0038 , 1.0078)	7.08331e-08
z_H3CHp	Trunk fat/Weight	-0.0054	0.9946 (0.9927 , 0.9965)	9.06655e-08
z_NAG1	Trunk fat/Weight	0.0058	1.0059 (1.0038 , 1.0079)	1.16828e-07
z_H2A1	Trunk fat/Weight	-0.0054	0.9946 (0.9927 , 0.9965)	1.18734e-07
z_Pyr	Trunk fat/Weight	0.0058	1.0058 (1.0038 , 1.0079)	1.18734e-07
z_V3PL	Trunk fat/Weight	0.0057	1.0057 (1.0037 , 1.0077)	1.28098e-07
z_VILFC	Trunk fat/Weight	0.0055	1.0055 (1.0036 , 1.0075)	1.28098e-07
z_V3CH	Trunk fat/Weight	0.0056	1.0057 (1.0036 , 1.0077)	1.49983e-07
z_H0FCp	Trunk fat/Weight	-0.0058	0.9942 (0.9922 , 0.9963)	1.58836e-07
z_VILCH	Trunk fat/Weight	0.0054	1.0054 (1.0035 , 1.0074)	2.26283e-07
z_V4CH	Trunk fat/Weight	0.0054	1.0055 (1.0035 , 1.0075)	2.78367e-07
z_V4LP	Trunk fat/Weight	0.0055	1.0055 (1.0035 , 1.0075)	2.99442e-07
z_LactPyR	Trunk fat/Weight	-0.0055	0.9945 (0.9925 , 0.9965)	3.15069e-07
z_L3FCp	Trunk fat/Weight	-0.0054	0.9946 (0.9926 , 0.9966)	3.25374e-07
z_H4TG	Trunk fat/Weight	0.0054	1.0054 (1.0034 , 1.0074)	3.93545e-07
z_L0PN	Trunk fat/Weight	0.0053	1.0053 (1.0034 , 1.0073)	4.11353e-07
z_H0A1	Trunk fat/Weight	-0.0053	0.9947 (0.9927 , 0.9966)	4.11353e-07
z_L0AB	Trunk fat/Weight	0.0053	1.0053 (1.0034 , 1.0073)	4.11353e-07
z_H3CH	Trunk fat/Weight	-0.0052	0.9948 (0.9929 , 0.9967)	4.11353e-07
z_V3LP	Trunk fat/Weight	0.0054	1.0054 (1.0034 , 1.0075)	5.71891e-07
z_nH0CH	Trunk fat/Weight	0.0052	1.0053 (1.0033 , 1.0072)	5.71891e-07
z_L4FCp	Trunk fat/Weight	-0.0053	0.9947 (0.9928 , 0.9967)	6.58813e-07
z_L5FC	Trunk fat/Weight	0.0052	1.0052 (1.0032 , 1.0072)	7.54007e-07
z_L4PN	Trunk fat/Weight	0.0053	1.0053 (1.0033 , 1.0073)	8.12426e-07
z_L4AB	Trunk fat/Weight	0.0053	1.0053 (1.0033 , 1.0073)	8.16085e-07
z_IDTGp	Trunk fat/Weight	0.0053	1.0053 (1.0033 , 1.0073)	9.85028e-07
z_L1TG	Trunk fat/Weight	0.0052	1.0052 (1.0032 , 1.0072)	1.19556e-06
z_V0PLp	Trunk fat/Weight	-0.0053	0.9947 (0.9927 , 0.9968)	1.36645e-06
z_ApoA1	Trunk fat/Weight	-0.0051	0.9949 (0.9929 , 0.9969)	1.63307e-06
z_Ile	Trunk fat/Weight	0.0049	1.0049 (1.003 , 1.0069)	1.98441e-06
z_V3TG	Trunk fat/Weight	0.0051	1.0051 (1.0031 , 1.0072)	2.385e-06
z_V4TG	Trunk fat/Weight	0.0051	1.0051 (1.0031 , 1.0072)	2.48074e-06
z_V3CE	Trunk fat/Weight	0.0051	1.0051 (1.003 , 1.0071)	2.6862e-06
z_V4CE	Trunk fat/Weight	0.005	1.005 (1.003 , 1.007)	2.84483e-06
z_V4FCp	Trunk fat/Weight	0.005	1.005 (1.003 , 1.007)	2.91375e-06
z_H3TGp	Trunk fat/Weight	0.0049	1.0049 (1.0029 , 1.0069)	2.91647e-06
z_L2FC	Trunk fat/Weight	-0.0051	0.9949 (0.9929 , 0.997)	4.51929e-06
z_L3TGp	Trunk fat/Weight	0.005	1.005 (1.0029 , 1.007)	5.41394e-06
z_H4TGp	Trunk fat/Weight	0.0048	1.0048 (1.0028 , 1.0068)	6.59596e-06
z_L1CHp	Trunk fat/Weight	-0.0048	0.9952 (0.9931 , 0.9972)	1.05415e-05
z_H3CE	Trunk fat/Weight	-0.0045	0.9955 (0.9936 , 0.9974)	1.13599e-05
z_L5CEp	Trunk fat/Weight	0.0046	1.0046 (1.0026 , 1.0066)	1.50583e-05
z_V5PL	Trunk fat/Weight	0.0047	1.0047 (1.0026 , 1.0067)	1.90642e-05
z_L2TGp	Trunk fat/Weight	0.0045	1.0045 (1.0025 , 1.0066)	3.26795e-05
z_L4CE	Trunk fat/Weight	0.0045	1.0045 (1.0024 , 1.0065)	3.72056e-05
z_L3CHp	Trunk fat/Weight	-0.0045	0.9955 (0.9934 , 0.9975)	4.04503e-05
z_V5CEp	Trunk fat/Weight	-0.0045	0.9955 (0.9935 , 0.9976)	4.1422e-05
z_L4LP	Trunk fat/Weight	0.0045	1.0045 (1.0024 , 1.0065)	4.25836e-05
z_L2CHTGR	Trunk fat/Weight	-0.0043	0.9957 (0.9937 , 0.9977)	4.7944e-05
z_L4CEp	Trunk fat/Weight	0.0043	1.0043 (1.0023 , 1.0064)	5.02491e-05
z_H1FCp	Trunk fat/Weight	-0.0044	0.9956 (0.9936 , 0.9977)	5.39143e-05
z_L3FC	Trunk fat/Weight	-0.0045	0.9956 (0.9935 , 0.9976)	5.89606e-05
z_H2FCp	Trunk fat/Weight	-0.0044	0.9956 (0.9936 , 0.9977)	5.89606e-05
z_L2PL	Trunk fat/Weight	-0.0045	0.9955 (0.9934 , 0.9976)	6.11474e-05
z_V5LP	Trunk fat/Weight	0.0044	1.0044 (1.0023 , 1.0065)	6.17599e-05
z_L2CH	Trunk fat/Weight	-0.0045	0.9955 (0.9934 , 0.9976)	6.17879e-05
z_L1CEp	Trunk fat/Weight	-0.0044	0.9956 (0.9935 , 0.9977)	7.96138e-05
z_V5TG	Trunk fat/Weight	0.0043	1.0043 (1.0022 , 1.0064)	9.17177e-05
z_V0CEp	Trunk fat/Weight	0.0042	1.0042 (1.0022 , 1.0063)	9.57375e-05
z_H3CHTGR	Trunk fat/Weight	-0.0043	0.9957 (0.9937 , 0.9978)	0.000100841
z_L0TGp	Trunk fat/Weight	0.0041	1.0041 (1.0021 , 1.0061)	0.000101397
z_H2TGp	Trunk fat/Weight	0.0041	1.0041 (1.0021 , 1.0061)	0.000114411
z_L3TG	Trunk fat/Weight	0.0041	1.0041 (1.0021 , 1.0061)	0.000119325
z_L3CHTGR	Trunk fat/Weight	-0.004	0.996 (0.994 , 0.9979)	0.000122897
z_L4PL	Trunk fat/Weight	0.0042	1.0042 (1.0021 , 1.0062)	0.000132285
z_PUFAp	Trunk fat/Weight	-0.0038	0.9962 (0.9943 , 0.9981)	0.000135202
z_H2CHp	Trunk fat/Weight	-0.0041	0.9959 (0.9939 , 0.9979)	0.00013644
z_L4PNp	Trunk fat/Weight	0.0042	1.0042 (1.0021 , 1.0063)	0.00013644
z_V2FCp	Trunk fat/Weight	0.0041	1.0041 (1.0021 , 1.0061)	0.000138392
z_H4CHTGR	Trunk fat/Weight	-0.0041	0.9959 (0.9939 , 0.998)	0.000188957
z_L4PLp	Trunk fat/Weight	-0.004	0.996 (0.994 , 0.998)	0.000192456
z_H0TGp	Trunk fat/Weight	0.004	1.004 (1.002 , 1.006)	0.00019637
z_L2LP	Trunk fat/Weight	-0.0042	0.9958 (0.9937 , 0.9979)	0.00020034
z_L4CH	Trunk fat/Weight	0.004	1.004 (1.002 , 1.0061)	0.000204583
z_V5PLp	Trunk fat/Weight	0.0041	1.0041 (1.002 , 1.0062)	0.000204583
z_H3LP	Trunk fat/Weight	-0.0038	0.9962 (0.9942 , 0.9981)	0.000207649
z_V4TGp	Trunk fat/Weight	-0.0039	0.9961 (0.9941 , 0.9981)	0.000216476
z_L2CHp	Trunk fat/Weight	-0.004	0.996 (0.9939 , 0.998)	0.00025092
z_L2CE	Trunk fat/Weight	-0.0041	0.9959 (0.9938 , 0.998)	0.000297814
z_L2FCp	Trunk fat/Weight	-0.0039	0.9961 (0.9941 , 0.9982)	0.000338693
z_L0CHTGR	Trunk fat/Weight	-0.0039	0.9961 (0.9941 , 0.9982)	0.00035967
z_H1TG	Trunk fat/Weight	-0.0037	0.9963 (0.9943 , 0.9983)	0.000388502
z_V4CHTGR	Trunk fat/Weight	0.0038	1.0038 (1.0018 , 1.0058)	0.000388721
z_L6FC	Trunk fat/Weight	0.0039	1.0039 (1.0018 , 1.006)	0.00040793
z_V3CHp	Trunk fat/Weight	0.0037	1.0037 (1.0017 , 1.0058)	0.000721349
z_L0LP	Trunk fat/Weight	0.0036	1.0036 (1.0016 , 1.0057)	0.000796005
z_H4CHp	Trunk fat/Weight	-0.0036	0.9964 (0.9944 , 0.9984)	0.000819817
z_H3A1	Trunk fat/Weight	-0.0035	0.9965 (0.9945 , 0.9985)	0.000879401
z_V1PLp	Trunk fat/Weight	0.0036	1.0036 (1.0015 , 1.0056)	0.000975334
z_H3PL	Trunk fat/Weight	-0.0034	0.9966 (0.9946 , 0.9985)	0.000975334
z_IDCHTGR	Trunk fat/Weight	-0.0031	0.997 (0.9952 , 0.9987)	0.00107233
z_L1PNp	Trunk fat/Weight	-0.0034	0.9966 (0.9946 , 0.9985)	0.00107534
z_L5PLp	Trunk fat/Weight	-0.0036	0.9965 (0.9944 , 0.9985)	0.00117268
z_L6PNp	Trunk fat/Weight	0.0036	1.0036 (1.0015 , 1.0057)	0.00117896
z_H1TGp	Trunk fat/Weight	0.0035	1.0035 (1.0015 , 1.0056)	0.00124804
z_Ala	Trunk fat/Weight	0.0036	1.0036 (1.0015 , 1.0057)	0.00138196
z_V3CHTGR	Trunk fat/Weight	0.0035	1.0035 (1.0014 , 1.0056)	0.00151872
z_V5CH	Trunk fat/Weight	0.0035	1.0035 (1.0014 , 1.0056)	0.00151872
z_IDFCp	Trunk fat/Weight	-0.0035	0.9965 (0.9944 , 0.9986)	0.00175538
z_H4FC	Trunk fat/Weight	-0.0034	0.9966 (0.9946 , 0.9987)	0.00208946
z_DHT	Trunk fat/Weight	0.0034	1.0034 (1.0013 , 1.0055)	0.00218782
z_L1CHTGR	Trunk fat/Weight	-0.0034	0.9966 (0.9945 , 0.9987)	0.00233613
z_L0PL	Trunk fat/Weight	0.0033	1.0033 (1.0013 , 1.0054)	0.00244717
z_L1FCp	Trunk fat/Weight	-0.0033	0.9967 (0.9946 , 0.9987)	0.0026054
z_H2A2	Trunk fat/Weight	-0.0032	0.9968 (0.9948 , 0.9988)	0.00274302
z_L2PN	Trunk fat/Weight	-0.0034	0.9966 (0.9945 , 0.9987)	0.00276127
z_L2AB	Trunk fat/Weight	-0.0034	0.9966 (0.9945 , 0.9987)	0.00276127
z_FC	Trunk fat/Weight	0.0032	1.0032 (1.0012 , 1.0053)	0.00292525
z_V5TGp	Trunk fat/Weight	-0.0033	0.9967 (0.9946 , 0.9988)	0.00325772
z_NAG2	Trunk fat/Weight	0.0033	1.0033 (1.0012 , 1.0054)	0.00341416
z_L0CE	Trunk fat/Weight	0.0032	1.0032 (1.0011 , 1.0052)	0.00349707
z_CE	Trunk fat/Weight	0.0032	1.0032 (1.0011 , 1.0052)	0.00352103
z_H0CHp	Trunk fat/Weight	-0.0031	0.9969 (0.9948 , 0.9989)	0.00361666
z_L0PLp	Trunk fat/Weight	-0.0031	0.9969 (0.9948 , 0.9989)	0.00383806
z_V1FCp	Trunk fat/Weight	0.0029	1.0029 (1.001 , 1.0049)	0.00491382
z_L2PLp	Trunk fat/Weight	-0.0031	0.9969 (0.9949 , 0.999)	0.00494165
z_V2PLp	Trunk fat/Weight	-0.0031	0.9969 (0.9949 , 0.999)	0.00530796
z_V4CHp	Trunk fat/Weight	0.003	1.003 (1.001 , 1.0051)	0.00547587
z_V3TGp	Trunk fat/Weight	-0.0031	0.9969 (0.9948 , 0.999)	0.00579075
z_L6TGp	Trunk fat/Weight	0.0028	1.0028 (1.0009 , 1.0048)	0.00721719
z_V1TGp	Trunk fat/Weight	-0.003	0.997 (0.9949 , 0.9991)	0.00748708
z_CH	Trunk fat/Weight	0.0029	1.0029 (1.0008 , 1.0049)	0.00833866
z_V0CHp	Trunk fat/Weight	0.0029	1.0029 (1.0008 , 1.005)	0.00839099
z_L0CH	Trunk fat/Weight	0.0028	1.0028 (1.0008 , 1.0049)	0.0092265
z_Met	Trunk fat/Weight	-0.0029	0.9971 (0.9951 , 0.9992)	0.0092265
z_V0FCp	Trunk fat/Weight	-0.003	0.997 (0.9949 , 0.9992)	0.0092265
z_His	Trunk fat/Weight	-0.0029	0.9971 (0.995 , 0.9992)	0.00942086
z_ApoA2	Trunk fat/Weight	-0.0027	0.9973 (0.9952 , 0.9993)	0.0119967
z_H0CHTGR	Trunk fat/Weight	-0.0027	0.9973 (0.9952 , 0.9994)	0.0141404
z_L0CHp	Trunk fat/Weight	-0.0026	0.9974 (0.9954 , 0.9994)	0.0153837
z_H2CHTGR	Trunk fat/Weight	-0.0027	0.9973 (0.9952 , 0.9994)	0.0154213
z_V4PLp	Trunk fat/Weight	0.0027	1.0027 (1.0006 , 1.0048)	0.0164883
z_Gly	Trunk fat/Weight	-0.0026	0.9974 (0.9953 , 0.9995)	0.0179277
z_H3PLp	Trunk fat/Weight	0.0025	1.0025 (1.0005 , 1.0045)	0.0180124
z_H1CEp	Trunk fat/Weight	0.0026	1.0026 (1.0005 , 1.0048)	0.0195515
z_IDCHp	Trunk fat/Weight	-0.0025	0.9975 (0.9954 , 0.9996)	0.025111
z_L3CH	Trunk fat/Weight	-0.0025	0.9975 (0.9953 , 0.9996)	0.0252396
z_Lactate	Trunk fat/Weight	0.0025	1.0025 (1.0004 , 1.0046)	0.0271453
z_L4FC	Trunk fat/Weight	0.0024	1.0024 (1.0003 , 1.0045)	0.0303698
z_L3PL	Trunk fat/Weight	-0.0025	0.9975 (0.9954 , 0.9997)	0.0304792
z_H1PLp	Trunk fat/Weight	-0.0024	0.9976 (0.9955 , 0.9997)	0.0304792
z_Cra	Trunk fat/Weight	0.0024	1.0024 (1.0003 , 1.0046)	0.0323243
z_V5CHTGR	Trunk fat/Weight	0.0024	1.0024 (1.0003 , 1.0045)	0.0338856
z_L6CHTGR	Trunk fat/Weight	-0.0023	0.9977 (0.9957 , 0.9998)	0.0415198
z_Cre	Trunk fat/Weight	-0.0019	0.9981 (0.9964 , 0.9999)	0.0466482
z_GLC	Trunk fat/Weight	0.0023	1.0023 (1.0001 , 1.0044)	0.0476811
z_L3PLp	Trunk fat/Weight	-0.0022	0.9978 (0.9957 , 0.9999)	0.0519952
z_H3CEp	Trunk fat/Weight	-0.0019	0.9981 (0.9963 , 1)	0.0580833
z_V5CHp	Trunk fat/Weight	0.0021	1.0021 (1 , 1.0042)	0.0580833
z_V0CHTGR	Trunk fat/Weight	0.0021	1.0021 (1 , 1.0042)	0.0647861
z_L3LP	Trunk fat/Weight	-0.0021	0.9979 (0.9958 , 1)	0.0654138
z_H0A2	Trunk fat/Weight	-0.002	0.998 (0.9959 , 1)	0.0657467
z_IDCEp	Trunk fat/Weight	-0.0021	0.998 (0.9958 , 1.0001)	0.0710432
z_H2CEp	Trunk fat/Weight	-0.002	0.998 (0.996 , 1.0001)	0.0710432
z_L1LP	Trunk fat/Weight	0.002	1.002 (0.9999 , 1.004)	0.0732634
z_Acaa	Trunk fat/Weight	-0.002	0.998 (0.9959 , 1.0001)	0.0732741
z_H2PLp	Trunk fat/Weight	0.002	1.002 (0.9999 , 1.0042)	0.0768928
z_AcOH	Trunk fat/Weight	-0.002	0.998 (0.9959 , 1.0001)	0.0796295
z_H3A2	Trunk fat/Weight	-0.0019	0.9981 (0.9961 , 1.0001)	0.0819654
z_Thr	Trunk fat/Weight	0.0019	1.0019 (0.9998 , 1.004)	0.095496
z_L3CEp	Trunk fat/Weight	-0.0019	0.9981 (0.996 , 1.0002)	0.0959723
z_L5CHTGR	Trunk fat/Weight	-0.0019	0.9982 (0.9961 , 1.0002)	0.0992619
z_PL	Trunk fat/Weight	0.0018	1.0018 (0.9998 , 1.0039)	0.0996206
z_L1AB	Trunk fat/Weight	0.0018	1.0018 (0.9998 , 1.0039)	0.100489
z_L1PN	Trunk fat/Weight	0.0018	1.0018 (0.9998 , 1.0039)	0.100489
z_L2TG	Trunk fat/Weight	0.0018	1.0018 (0.9997 , 1.0038)	0.111504
z_L0FC	Trunk fat/Weight	0.0018	1.0018 (0.9997 , 1.0038)	0.114056
z_H3TG	Trunk fat/Weight	0.0017	1.0017 (0.9996 , 1.0038)	0.131491
z_L3CE	Trunk fat/Weight	-0.0017	0.9983 (0.9962 , 1.0004)	0.133774
z_V4CEp	Trunk fat/Weight	-0.0017	0.9983 (0.9962 , 1.0004)	0.142381
z_H2TG	Trunk fat/Weight	-0.0015	0.9985 (0.9964 , 1.0005)	0.16205
z_L4CHTGR	Trunk fat/Weight	-0.0016	0.9984 (0.9962 , 1.0005)	0.16205
z_X_HBA	Trunk fat/Weight	-0.0015	0.9985 (0.9964 , 1.0006)	0.184368
z_L5TGp	Trunk fat/Weight	0.0015	1.0015 (0.9994 , 1.0035)	0.188001
z_V1CHp	Trunk fat/Weight	0.0015	1.0015 (0.9994 , 1.0036)	0.192427
z_L6CHp	Trunk fat/Weight	0.0014	1.0014 (0.9994 , 1.0035)	0.19642
z_H4A2	Trunk fat/Weight	0.0014	1.0014 (0.9993 , 1.0035)	0.2075
z_V2CHTGR	Trunk fat/Weight	0.0014	1.0014 (0.9993 , 1.0036)	0.218757
z_Acto	Trunk fat/Weight	-0.0014	0.9986 (0.9966 , 1.0007)	0.231519
z_V2CHp	Trunk fat/Weight	0.0013	1.0013 (0.9992 , 1.0034)	0.247442
z_L1PL	Trunk fat/Weight	0.0012	1.0012 (0.9992 , 1.0033)	0.273956
z_H4A1	Trunk fat/Weight	0.0012	1.0012 (0.9991 , 1.0033)	0.294417
z_L4TGp	Trunk fat/Weight	0.0012	1.0012 (0.9991 , 1.0033)	0.295658
z_V1CHTGR	Trunk fat/Weight	-0.0011	0.9989 (0.9967 , 1.001)	0.328986
z_V3CEp	Trunk fat/Weight	0.0011	1.0011 (0.999 , 1.0032)	0.328986
z_L3PN	Trunk fat/Weight	-0.0011	0.9989 (0.9967 , 1.001)	0.329373
z_L3AB	Trunk fat/Weight	-0.0011	0.9989 (0.9968 , 1.001)	0.330201
z_L2CEp	Trunk fat/Weight	-0.0011	0.9989 (0.9967 , 1.001)	0.334972
z_H4PL	Trunk fat/Weight	0.001	1.001 (0.9989 , 1.0031)	0.392502
z_L4CHp	Trunk fat/Weight	9e-04	1.0009 (0.9989 , 1.003)	0.404891
z_L1CE	Trunk fat/Weight	9e-04	1.0009 (0.9988 , 1.003)	0.416712
z_H4LP	Trunk fat/Weight	9e-04	1.0009 (0.9988 , 1.003)	0.421404
z_FA	Trunk fat/Weight	8e-04	1.0008 (0.9988 , 1.0028)	0.446564
z_L1CH	Trunk fat/Weight	8e-04	1.0008 (0.9988 , 1.0029)	0.461467
z_V2TGp	Trunk fat/Weight	8e-04	1.0008 (0.9987 , 1.0029)	0.483455
z_V0TGp	Trunk fat/Weight	8e-04	1.0008 (0.9986 , 1.003)	0.506108
z_Oni	Trunk fat/Weight	7e-04	1.0007 (0.9987 , 1.0028)	0.50724
z_H1CHp	Trunk fat/Weight	-0.0008	0.9992 (0.9972 , 1.0013)	0.507467
z_H0TG	Trunk fat/Weight	-0.0007	0.9993 (0.9972 , 1.0013)	0.510229
z_L5CHp	Trunk fat/Weight	7e-04	1.0007 (0.9986 , 1.0028)	0.519214
z_V5CE	Trunk fat/Weight	-0.0007	0.9993 (0.9971 , 1.0014)	0.538373
z_H4CEp	Trunk fat/Weight	-0.0007	0.9993 (0.9973 , 1.0014)	0.538373
z_V2CEp	Trunk fat/Weight	-0.0007	0.9993 (0.9972 , 1.0014)	0.539215
z_LeuIleR	Trunk fat/Weight	-0.0007	0.9993 (0.9971 , 1.0014)	0.539215
z_H4CE	Trunk fat/Weight	7e-04	1.0007 (0.9986 , 1.0027)	0.557916
z_L1FC	Trunk fat/Weight	6e-04	1.0006 (0.9985 , 1.0027)	0.585544
z_H0CEp	Trunk fat/Weight	-0.0004	0.9996 (0.9975 , 1.0016)	0.693594
z_V3PLp	Trunk fat/Weight	5e-04	1.0005 (0.9983 , 1.0026)	0.694142
z_H4CH	Trunk fat/Weight	-0.0004	0.9996 (0.9975 , 1.0017)	0.752726
z_H0PLp	Trunk fat/Weight	3e-04	1.0003 (0.9982 , 1.0024)	0.776888
z_FisherR	Trunk fat/Weight	3e-04	1.0003 (0.9983 , 1.0023)	0.783376
z_H4PLp	Trunk fat/Weight	2e-04	1.0002 (0.9981 , 1.0023)	0.859769
z_Citrate	Trunk fat/Weight	-0.0001	0.9999 (0.9978 , 1.0019)	0.921045
z_V1CEp	Trunk fat/Weight	-0.0001	0.9999 (0.9978 , 1.0021)	0.947705
z_H1CHTGR	Trunk fat/Weight	0	1 (0.9979 , 1.0021)	0.969895
z_L0CEp	Trunk fat/Weight	0	1 (0.998 , 1.002)	0.986312
Model adjusted for age, sex, marital, Education, Insurance, Household income, Smoking, Drinking , PA, BMI

## Sheet: Table S4
Table S5. Regression analysis of lipoproteins and MetS.
Y	X	b	OR(95%CI)	P
MetS	z_V2FC	2.23765	9.37 (8.95 , 9.79)	1.27066e-23
MetS	z_V1TG	2.48134	11.96 (11.49 , 12.43)	1.27066e-23
MetS	z_V1PL	2.4543	11.64 (11.18 , 12.1)	1.27066e-23
MetS	z_V1LP	2.55101	12.82 (12.34 , 13.3)	1.27066e-23
MetS	z_V1FC	2.31594	10.13 (9.69 , 10.57)	1.27066e-23
MetS	z_V2LP	2.13888	8.49 (8.08 , 8.9)	1.27066e-23
MetS	z_V0PL	2.54229	12.71 (12.23 , 13.19)	1.27066e-23
MetS	z_MUPUR	2.6565	14.25 (13.75 , 14.75)	1.27066e-23
MetS	z_VIDTG	2.6213	13.75 (13.25 , 14.25)	1.27066e-23
MetS	z_VIDPL	2.28451	9.82 (9.39 , 10.25)	1.27066e-23
MetS	z_V0TG	2.5899	13.33 (12.84 , 13.82)	1.27066e-23
MetS	z_V2TG	2.15545	8.63 (8.22 , 9.04)	1.27066e-23
MetS	z_V2PL	2.05556	7.81 (7.42 , 8.2)	1.27066e-23
MetS	z_VILTG	2.6718	14.47 (13.96 , 14.98)	1.27066e-23
MetS	z_V0CH	2.41975	11.24 (10.78 , 11.7)	1.27066e-23
MetS	z_V3FC	2.01	7.46 (7.08 , 7.84)	1.27066e-23
MetS	z_V0LP	2.59859	13.44 (12.95 , 13.93)	1.27066e-23
MetS	z_IDTG	2.71634	15.12 (14.6 , 15.64)	1.27066e-23
MetS	z_UPUR	2.61452	13.66 (13.16 , 14.16)	1.27066e-23
MetS	z_V1CH	2.64813	14.13 (13.63 , 14.63)	1.29077e-23
MetS	z_VCHHCR	2.92515	18.64 (18.08 , 19.2)	1.29077e-23
MetS	z_V2CH	2.06203	7.86 (7.47 , 8.25)	1.4652e-23
MetS	z_V0FC	2.67635	14.53 (14.02 , 15.04)	1.57813e-23
MetS	z_V0CE	2.21602	9.17 (8.75 , 9.59)	1.63836e-23
MetS	z_VIDFC	2.35387	10.53 (10.08 , 10.98)	1.63836e-23
MetS	z_TG	2.90078	18.19 (17.63 , 18.75)	1.78027e-23
MetS	z_VIDCH	2.11263	8.27 (7.86 , 8.68)	2.20767e-23
MetS	z_V1CE	2.81085	16.62 (16.08 , 17.16)	2.78293e-23
MetS	z_V0PN	2.82348	16.84 (16.3 , 17.38)	3.1635e-23
MetS	z_V0AB	2.82285	16.82 (16.28 , 17.36)	3.1635e-23
MetS	z_MUFAp	2.57417	13.12 (12.62 , 13.62)	3.16887e-23
MetS	z_VIDAB	2.26205	9.6 (9.16 , 10.04)	3.43091e-23
MetS	z_VIDPN	2.2575	9.56 (9.12 , 10)	3.43091e-23
MetS	z_TGPLR	3.16888	23.78 (23.17 , 24.39)	3.91765e-23
MetS	z_IDLP	2.13711	8.47 (8.06 , 8.88)	4.884e-23
MetS	z_V3LP	1.78393	5.95 (5.6 , 6.3)	4.884e-23
MetS	z_V3TG	1.80964	6.11 (5.76 , 6.46)	5.76e-23
MetS	z_V3PL	1.76762	5.86 (5.51 , 6.21)	1.04282e-22
MetS	z_V2CE	1.85384	6.38 (6.02 , 6.74)	1.60523e-22
MetS	z_TGHCR	3.49569	32.97 (32.28 , 33.66)	1.60673e-22
MetS	z_NAG12R	2.44518	11.53 (11.05 , 12.01)	2.72898e-22
MetS	z_V3CH	1.65315	5.22 (4.89 , 5.55)	3.97221e-22
MetS	z_ICHHCR	1.85921	6.42 (6.05 , 6.79)	5.25056e-22
MetS	z_L3PNp	-1.88393	0.15 (-0.23 , 0.53)	1.19577e-21
MetS	z_H4TGp	2.03407	7.65 (7.24 , 8.06)	2.0572e-21
MetS	z_V4PL	1.75395	5.78 (5.42 , 6.14)	4.57513e-21
MetS	z_V4TG	1.74936	5.75 (5.39 , 6.11)	5.20755e-21
MetS	z_V4LP	1.69667	5.46 (5.11 , 5.81)	6.19519e-21
MetS	z_L0FCp	-1.81486	0.16 (-0.21 , 0.53)	7.06776e-21
MetS	z_UFAp	1.76177	5.82 (5.46 , 6.18)	9.27176e-21
MetS	z_SFAp	-1.76177	0.17 (-0.19 , 0.53)	9.27176e-21
MetS	z_H3TGp	1.71727	5.57 (5.22 , 5.92)	1.01181e-20
MetS	z_L6TG	1.88596	6.59 (6.2 , 6.98)	1.42625e-20
MetS	z_V5CEp	-1.36832	0.25 (-0.04 , 0.54)	5.8275e-20
MetS	z_ABHCR	1.78156	5.94 (5.57 , 6.31)	6.59945e-20
MetS	z_V3CE	1.38979	4.01 (3.72 , 4.3)	7.67089e-20
MetS	z_IDPL	1.56049	4.76 (4.43 , 5.09)	8.88e-20
MetS	z_CHTGR	-4.59531	0.01 (-0.96 , 0.98)	1.36645e-19
MetS	z_V4CH	1.47785	4.38 (4.07 , 4.69)	1.78353e-19
MetS	z_V4FC	1.46022	4.31 (4 , 4.62)	2.4753e-19
MetS	z_V4CE	1.41897	4.13 (3.83 , 4.43)	2.71313e-19
MetS	z_H4CHTGR	-3.16982	0.04 (-0.64 , 0.72)	6.23032e-19
MetS	z_nHCHCR	1.48758	4.43 (4.11 , 4.75)	9.03857e-19
MetS	z_L5TG	1.3658	3.92 (3.62 , 4.22)	9.62578e-19
MetS	z_IDTGp	1.55298	4.73 (4.39 , 5.07)	9.88754e-19
MetS	z_L6PN	1.40425	4.07 (3.76 , 4.38)	1.08349e-18
MetS	z_L6AB	1.40401	4.07 (3.76 , 4.38)	1.08349e-18
MetS	z_IDCE	1.38281	3.99 (3.69 , 4.29)	1.57685e-18
MetS	z_IDCH	1.38379	3.99 (3.69 , 4.29)	1.6983e-18
MetS	z_L6PNp	1.51035	4.53 (4.2 , 4.86)	1.6983e-18
MetS	z_CHHCR	1.46867	4.34 (4.02 , 4.66)	2.11056e-18
MetS	z_IDFC	1.37574	3.96 (3.66 , 4.26)	2.43738e-18
MetS	z_H3CHTGR	-3.02366	0.05 (-0.62 , 0.72)	2.44504e-18
MetS	z_H4TG	1.56914	4.8 (4.45 , 5.15)	3.3435e-18
MetS	z_L1TGp	1.43194	4.19 (3.87 , 4.51)	4.0848e-18
MetS	z_L3FC	-1.60101	0.2 (-0.16 , 0.56)	8.85079e-18
MetS	z_ABA1R	1.6754	5.34 (4.96 , 5.72)	8.95208e-18
MetS	z_L6CE	1.29575	3.65 (3.36 , 3.94)	1.12708e-17
MetS	z_PUFAp	-1.40699	0.24 (-0.08 , 0.56)	2.31414e-17
MetS	z_IDPN	1.33477	3.8 (3.5 , 4.1)	3.256e-17
MetS	z_IDAB	1.33341	3.79 (3.49 , 4.09)	3.256e-17
MetS	z_VLCHHCR	1.34911	3.85 (3.54 , 4.16)	3.89448e-17
MetS	z_L6LP	1.24486	3.47 (3.19 , 3.75)	4.21265e-17
MetS	z_H3CHp	-1.61015	0.2 (-0.17 , 0.57)	5.03464e-17
MetS	z_L3CHTGR	-1.77116	0.17 (-0.24 , 0.58)	6.38576e-17
MetS	z_L1PLp	-1.84057	0.16 (-0.26 , 0.58)	7.31826e-17
MetS	z_H0TGp	1.33443	3.8 (3.49 , 4.11)	8.68862e-17
MetS	z_L6PL	1.20045	3.32 (3.04 , 3.6)	1.16172e-16
MetS	z_L6CH	1.17076	3.22 (2.94 , 3.5)	2.74257e-16
MetS	z_NAG1	1.30266	3.68 (3.37 , 3.99)	3.4521e-16
MetS	z_H0FC	-1.76439	0.17 (-0.25 , 0.59)	5.12308e-16
MetS	z_nH0CHp	1.64448	5.18 (4.79 , 5.57)	5.35696e-16
MetS	z_IDFCp	-1.23177	0.29 (0 , 0.58)	6.69581e-16
MetS	z_H2TGp	1.24235	3.46 (3.16 , 3.76)	9.13979e-16
MetS	z_L5FCp	-4.39535	0.01 (-1.05 , 1.07)	2.08563e-15
MetS	z_L3TGp	1.43093	4.18 (3.83 , 4.53)	2.52178e-15
MetS	z_L0TG	1.27526	3.58 (3.27 , 3.89)	2.71497e-15
MetS	z_VILPL	1.10018	3 (2.73 , 3.27)	2.71497e-15
MetS	z_L1CHp	-1.13948	0.32 (0.04 , 0.6)	3.21012e-15
MetS	z_L6PLp	-1.96585	0.14 (-0.34 , 0.62)	3.21012e-15
MetS	z_H4CHp	-1.18628	0.31 (0.02 , 0.6)	7.71505e-15
MetS	z_L2PNp	-1.22629	0.29 (-0.01 , 0.59)	8.35765e-15
MetS	z_L3CHp	-1.16762	0.31 (0.01 , 0.61)	3.87961e-14
MetS	z_H0CHTGR	-1.95149	0.14 (-0.36 , 0.64)	3.93837e-14
MetS	z_H4FCp	-1.08719	0.34 (0.06 , 0.62)	5.04257e-14
MetS	z_H3FCp	-0.997474	0.37 (0.11 , 0.63)	6.50292e-14
MetS	z_IDCHp	-1.08702	0.34 (0.06 , 0.62)	9.67879e-14
MetS	z_L6FCp	-1.30818	0.27 (-0.07 , 0.61)	1.08533e-13
MetS	z_L3CH	-1.17086	0.31 (0.01 , 0.61)	1.59473e-13
MetS	z_L2FC	-1.24	0.29 (-0.03 , 0.61)	1.59537e-13
MetS	z_H2CHTGR	-2.10066	0.12 (-0.43 , 0.67)	1.62e-13
MetS	z_L3PL	-1.16548	0.31 (0.01 , 0.61)	1.76519e-13
MetS	z_L0CHTGR	-1.18973	0.3 (-0.01 , 0.61)	1.76519e-13
MetS	z_V3FCp	1.7085	5.52 (5.07 , 5.97)	1.88992e-13
MetS	z_V5TG	1.03395	2.81 (2.54 , 3.08)	4.28557e-13
MetS	z_L0TGp	1.27351	3.57 (3.23 , 3.91)	6.31552e-13
MetS	z_IDCEp	-1.02561	0.36 (0.09 , 0.63)	7.57077e-13
MetS	z_IDPLp	-1.2854	0.28 (-0.06 , 0.62)	7.64771e-13
MetS	z_L1CEp	-0.982345	0.37 (0.11 , 0.63)	1.03258e-12
MetS	z_H1FC	-1.46841	0.23 (-0.17 , 0.63)	1.28205e-12
MetS	z_H2FC	-1.14364	0.32 (0.01 , 0.63)	1.7283e-12
MetS	z_H0CH	-1.26081	0.28 (-0.06 , 0.62)	1.78237e-12
MetS	z_L2PL	-1.14272	0.32 (0.01 , 0.63)	2.76605e-12
MetS	z_L3LP	-1.07947	0.34 (0.04 , 0.64)	2.76605e-12
MetS	z_H2FCp	-0.870627	0.42 (0.18 , 0.66)	3.03696e-12
MetS	z_H3FC	-1.09059	0.34 (0.04 , 0.64)	3.7e-12
MetS	z_V5PL	0.977294	2.66 (2.39 , 2.93)	4.66724e-12
MetS	z_V5LP	0.945985	2.58 (2.32 , 2.84)	5.28117e-12
MetS	z_H0FCp	-0.912574	0.4 (0.14 , 0.66)	6.81488e-12
MetS	z_L5PN	0.894235	2.45 (2.2 , 2.7)	8.31229e-12
MetS	z_L5AB	0.89429	2.45 (2.2 , 2.7)	8.31229e-12
MetS	z_H2CHp	-1.23164	0.29 (-0.06 , 0.64)	8.325e-12
MetS	z_VILAB	0.887845	2.43 (2.18 , 2.68)	1.00651e-11
MetS	z_VILPN	0.88748	2.43 (2.18 , 2.68)	1.0164e-11
MetS	z_L6CEp	1.32395	3.76 (3.38 , 4.14)	1.1766e-11
MetS	z_H3CH	-1.09171	0.34 (0.03 , 0.65)	1.18264e-11
MetS	z_H2CH	-1.23361	0.29 (-0.06 , 0.64)	1.4792e-11
MetS	z_H1TGp	0.875886	2.4 (2.15 , 2.65)	1.4792e-11
MetS	z_L5PNp	1.05512	2.87 (2.57 , 3.17)	2.49151e-11
MetS	z_L3CE	-1.00396	0.37 (0.08 , 0.66)	2.80671e-11
MetS	z_L5LP	0.850292	2.34 (2.09 , 2.59)	4.74702e-11
MetS	z_L5CE	0.850072	2.34 (2.09 , 2.59)	6.86812e-11
MetS	z_ApoB	0.843172	2.32 (2.07 , 2.57)	6.86812e-11
MetS	z_ABPN	0.843175	2.32 (2.07 , 2.57)	6.86812e-11
MetS	z_L2CH	-0.996013	0.37 (0.08 , 0.66)	7.9231e-11
MetS	z_L2LP	-1.00327	0.37 (0.07 , 0.67)	8.91801e-11
MetS	z_VILFC	0.822861	2.28 (2.03 , 2.53)	1.18929e-10
MetS	z_L6FC	0.783448	2.19 (1.95 , 2.43)	1.8045e-10
MetS	z_H0CE	-0.999565	0.37 (0.07 , 0.67)	2.36899e-10
MetS	z_L1TG	1.07999	2.94 (2.61 , 3.27)	2.5752e-10
MetS	z_H3CE	-0.993639	0.37 (0.07 , 0.67)	2.97715e-10
MetS	z_H3CEp	-0.976611	0.38 (0.08 , 0.68)	4.20632e-10
MetS	z_L5CH	0.78657	2.2 (1.95 , 2.45)	6.92118e-10
MetS	z_H2CE	-1.11794	0.33 (-0.02 , 0.68)	7.0276e-10
MetS	z_L3CEp	-0.707086	0.49 (0.27 , 0.71)	7.36897e-10
MetS	z_L5PL	0.786559	2.2 (1.95 , 2.45)	7.83404e-10
MetS	z_H3TG	0.788415	2.2 (1.95 , 2.45)	9.01433e-10
MetS	z_L3PN	-0.888508	0.41 (0.13 , 0.69)	9.46642e-10
MetS	z_L3AB	-0.888405	0.41 (0.13 , 0.69)	9.46642e-10
MetS	z_L3FCp	-1.05446	0.35 (0.02 , 0.68)	9.96919e-10
MetS	z_H4FC	-0.82084	0.44 (0.18 , 0.7)	1.14171e-09
MetS	z_H0CHp	-0.818606	0.44 (0.18 , 0.7)	1.29911e-09
MetS	z_H1FCp	-0.751931	0.47 (0.23 , 0.71)	2.02456e-09
MetS	z_L2CE	-0.855033	0.43 (0.15 , 0.71)	2.65994e-09
MetS	z_VILCH	0.735774	2.09 (1.85 , 2.33)	3.552e-09
MetS	z_V0PLp	-1.04531	0.35 (0.01 , 0.69)	3.77133e-09
MetS	z_H0LP	-0.998146	0.37 (0.04 , 0.7)	4.10766e-09
MetS	z_H0PL	-1.00645	0.37 (0.04 , 0.7)	5.05446e-09
MetS	z_L2PN	-0.830297	0.44 (0.17 , 0.71)	5.68059e-09
MetS	z_L2AB	-0.830278	0.44 (0.17 , 0.71)	5.68059e-09
MetS	z_V2PLp	-1.60179	0.2 (-0.34 , 0.74)	9.05526e-09
MetS	z_L1FCp	-0.737773	0.48 (0.23 , 0.73)	2.07157e-08
MetS	z_nH0CH	0.695964	2.01 (1.77 , 2.25)	2.44457e-08
MetS	z_L6CHTGR	-0.706705	0.49 (0.24 , 0.74)	3.75103e-08
MetS	z_LHCR	0.708595	2.03 (1.78 , 2.28)	4.09114e-08
MetS	z_H0A1	-0.822058	0.44 (0.15 , 0.73)	4.97608e-08
MetS	z_H1CH	-0.983797	0.37 (0.01 , 0.73)	1.17773e-07
MetS	z_ApoA1	-0.768543	0.46 (0.18 , 0.74)	1.37877e-07
MetS	z_V5CH	0.646297	1.91 (1.67 , 2.15)	1.82499e-07
MetS	z_L6TGp	0.697068	2.01 (1.75 , 2.27)	1.85e-07
MetS	z_L2PLp	-0.742817	0.48 (0.2 , 0.76)	2.35492e-07
MetS	z_V0CEp	0.823445	2.28 (1.97 , 2.59)	2.72621e-07
MetS	z_H2LP	-0.822269	0.44 (0.13 , 0.75)	2.72951e-07
MetS	z_H4CEp	-0.658341	0.52 (0.27 , 0.77)	3.04043e-07
MetS	z_L4TGp	0.562442	1.75 (1.54 , 1.96)	3.564e-07
MetS	z_L0CHp	-0.714398	0.49 (0.22 , 0.76)	3.74177e-07
MetS	z_H4CH	-0.655541	0.52 (0.27 , 0.77)	5.16417e-07
MetS	z_H1PL	-0.927192	0.4 (0.04 , 0.76)	9.33463e-07
MetS	z_L4CHTGR	-0.911773	0.4 (0.04 , 0.76)	9.67286e-07
MetS	z_L5PLp	-1.56585	0.21 (-0.41 , 0.83)	1.0989e-06
MetS	z_NAG2	0.64389	1.9 (1.65 , 2.15)	1.19427e-06
MetS	z_L1PNp	-0.748255	0.47 (0.17 , 0.77)	1.32159e-06
MetS	z_H2PL	-0.756641	0.47 (0.17 , 0.77)	1.37168e-06
MetS	z_L5FC	0.574726	1.78 (1.55 , 2.01)	1.80232e-06
MetS	z_L4TG	0.665073	1.94 (1.67 , 2.21)	2.04923e-06
MetS	z_H1LP	-0.856108	0.42 (0.07 , 0.77)	2.95622e-06
MetS	z_H1A1	-0.840184	0.43 (0.08 , 0.78)	3.73569e-06
MetS	z_L2FCp	-0.578201	0.56 (0.32 , 0.8)	3.83455e-06
MetS	z_V4FCp	0.69824	2.01 (1.72 , 2.3)	3.86548e-06
MetS	z_V3PLp	-0.797896	0.45 (0.12 , 0.78)	4.5954e-06
MetS	z_L0PLp	-0.821268	0.44 (0.1 , 0.78)	4.72164e-06
MetS	z_Gln	-0.562675	0.57 (0.33 , 0.81)	5.58847e-06
MetS	z_H3A1	-0.653868	0.52 (0.24 , 0.8)	8.08714e-06
MetS	z_L2TGp	0.652001	1.92 (1.64 , 2.2)	8.43926e-06
MetS	z_V5PLp	0.702639	2.02 (1.72 , 2.32)	9.1778e-06
MetS	z_H1CE	-0.765889	0.46 (0.13 , 0.79)	9.7487e-06
MetS	z_H4CE	-0.562952	0.57 (0.33 , 0.81)	9.7487e-06
MetS	z_L0PN	0.521616	1.68 (1.45 , 1.91)	1.06911e-05
MetS	z_L0AB	0.521624	1.68 (1.45 , 1.91)	1.06911e-05
MetS	z_PL	0.522332	1.69 (1.46 , 1.92)	1.14806e-05
MetS	z_L1CHTGR	-1.14455	0.32 (-0.18 , 0.82)	1.36672e-05
MetS	z_L2CHTGR	-0.593568	0.55 (0.29 , 0.81)	1.60217e-05
MetS	z_H3LP	-0.620132	0.54 (0.26 , 0.82)	1.64155e-05
MetS	z_L5CHTGR	-0.666253	0.51 (0.21 , 0.81)	1.78949e-05
MetS	z_FC	0.502758	1.65 (1.42 , 1.88)	1.998e-05
MetS	z_H1CHTGR	-1.30909	0.27 (-0.33 , 0.87)	2.72875e-05
MetS	z_L3PLp	-0.646365	0.52 (0.22 , 0.82)	2.74687e-05
MetS	z_L3TG	0.548278	1.73 (1.48 , 1.98)	3.0245e-05
MetS	z_Thr	0.477955	1.61 (1.39 , 1.83)	3.16274e-05
MetS	z_L4FCp	-1.20631	0.3 (-0.26 , 0.86)	3.25432e-05
MetS	z_Met	-0.870804	0.42 (0.02 , 0.82)	3.40534e-05
MetS	z_H0TG	0.490667	1.63 (1.4 , 1.86)	3.675e-05
MetS	z_L4PLp	-0.890951	0.41 (-0.03 , 0.85)	8.95964e-05
MetS	z_H2A1	-0.582306	0.56 (0.28 , 0.84)	9.02371e-05
MetS	z_H3PL	-0.5548	0.57 (0.3 , 0.84)	9.1908e-05
MetS	z_LeuIleR	-0.509086	0.6 (0.35 , 0.85)	0.000127896
MetS	z_V0FCp	-0.575086	0.56 (0.27 , 0.85)	0.000167468
MetS	z_Gly	-0.492339	0.61 (0.36 , 0.86)	0.000215249
MetS	z_Ile	0.433704	1.54 (1.32 , 1.76)	0.000222709
MetS	z_V2TGp	0.775313	2.17 (1.76 , 2.58)	0.000295562
MetS	z_V1TGp	-0.449867	0.64 (0.4 , 0.88)	0.000353957
MetS	z_L2CHp	-0.453	0.64 (0.4 , 0.88)	0.0003708
MetS	z_IDCHTGR	-1.86385	0.16 (-0.86 , 1.18)	0.000460971
MetS	z_Glu	0.379169	1.46 (1.25 , 1.67)	0.00059271
MetS	z_Val	0.421003	1.52 (1.28 , 1.76)	0.000717993
MetS	z_CE	0.38418	1.47 (1.25 , 1.69)	0.000949056
MetS	z_L5CEp	0.690752	2 (1.6 , 2.4)	0.00104904
MetS	z_V3CHp	0.484408	1.62 (1.33 , 1.91)	0.00121626
MetS	z_CH	0.380765	1.46 (1.24 , 1.68)	0.00124079
MetS	z_H1CHp	-0.361671	0.7 (0.49 , 0.91)	0.00124211
MetS	z_L4FC	-0.3931	0.67 (0.44 , 0.9)	0.00130008
MetS	z_H2CEp	-0.394991	0.67 (0.43 , 0.91)	0.00146875
MetS	z_L5TGp	0.359356	1.43 (1.21 , 1.65)	0.00150614
MetS	z_AAA	0.360774	1.43 (1.21 , 1.65)	0.00198971
MetS	z_H0CEp	-0.349268	0.71 (0.49 , 0.93)	0.00226422
MetS	z_V5CE	-0.357807	0.7 (0.48 , 0.92)	0.00245082
MetS	z_Phe	0.344274	1.41 (1.19 , 1.63)	0.00256903
MetS	z_V0CHp	0.445516	1.56 (1.28 , 1.84)	0.00280334
MetS	z_ApoA2	-0.359094	0.7 (0.47 , 0.93)	0.0031358
MetS	z_H4A1	-0.360804	0.7 (0.46 , 0.94)	0.00353058
MetS	z_BCAA	0.352319	1.42 (1.18 , 1.66)	0.00453012
MetS	z_H4LP	-0.341455	0.71 (0.47 , 0.95)	0.00582152
MetS	z_V1CHp	0.335067	1.4 (1.17 , 1.63)	0.00610745
MetS	z_V2FCp	0.298427	1.35 (1.14 , 1.56)	0.00776433
MetS	z_H2TG	0.320823	1.38 (1.15 , 1.61)	0.00788747
MetS	z_H4PL	-0.320071	0.73 (0.49 , 0.97)	0.0101102
MetS	z_V4PLp	-0.339653	0.71 (0.46 , 0.96)	0.0102261
MetS	z_V5TGp	-0.365095	0.69 (0.41 , 0.97)	0.0125609
MetS	z_V2CEp	-0.412471	0.66 (0.35 , 0.97)	0.0131455
MetS	z_H2PLp	0.288173	1.33 (1.11 , 1.55)	0.0131455
MetS	z_V1PLp	0.359439	1.43 (1.15 , 1.71)	0.0144552
MetS	z_L1FC	-0.29644	0.74 (0.5 , 0.98)	0.0172715
MetS	z_L1CH	-0.303829	0.74 (0.5 , 0.98)	0.0176442
MetS	z_V1FCp	0.311316	1.37 (1.12 , 1.62)	0.0191843
MetS	z_His	-0.271719	0.76 (0.54 , 0.98)	0.0191843
MetS	z_V4CHp	0.347437	1.42 (1.14 , 1.7)	0.0191843
MetS	z_L4CHp	-0.260889	0.77 (0.56 , 0.98)	0.0191843
MetS	z_L1CE	-0.300792	0.74 (0.5 , 0.98)	0.0192719
MetS	z_Ala	0.268721	1.31 (1.09 , 1.53)	0.0211808
MetS	z_Tyr	0.255447	1.29 (1.07 , 1.51)	0.0256718
MetS	z_Citrate	-0.267536	0.77 (0.54 , 1)	0.0282505
MetS	z_H3PLp	0.258849	1.3 (1.07 , 1.53)	0.0312
MetS	z_Pyr	0.236081	1.27 (1.06 , 1.48)	0.0342472
MetS	z_H0A2	-0.253724	0.78 (0.55 , 1.01)	0.0358389
MetS	z_V4CHTGR	0.273664	1.31 (1.06 , 1.56)	0.0380295
MetS	z_H1PLp	-0.218521	0.8 (0.58 , 1.02)	0.0569975
MetS	z_LactPyR	-0.232942	0.79 (0.55 , 1.03)	0.0684625
MetS	z_DHT	0.213544	1.24 (1.02 , 1.46)	0.0694158
MetS	z_L0CEp	-0.199245	0.82 (0.61 , 1.03)	0.0814353
MetS	z_H4A2	-0.215576	0.81 (0.58 , 1.04)	0.0822491
MetS	z_GLC	0.170919	1.19 (1.01 , 1.37)	0.0825423
MetS	z_L1PL	-0.21759	0.8 (0.56 , 1.04)	0.087417
MetS	z_V0CHTGR	0.224611	1.25 (1 , 1.5)	0.0892903
MetS	z_V4CEp	-0.193266	0.82 (0.6 , 1.04)	0.0996007
MetS	z_L0LP	0.188298	1.21 (0.99 , 1.43)	0.104969
MetS	z_V0TGp	0.18781	1.21 (0.99 , 1.43)	0.115285
MetS	z_Oni	-0.22942	0.79 (0.52 , 1.06)	0.116209
MetS	z_V3CHTGR	0.192407	1.21 (0.98 , 1.44)	0.116644
MetS	z_AcOH	-0.226945	0.8 (0.52 , 1.08)	0.126934
MetS	z_L4PNp	-0.171567	0.84 (0.61 , 1.07)	0.158322
MetS	z_Cre	-0.190389	0.83 (0.57 , 1.09)	0.171344
MetS	z_V5CHTGR	0.166855	1.18 (0.95 , 1.41)	0.177544
MetS	z_H1A2	-0.179668	0.84 (0.59 , 1.09)	0.189006
MetS	z_L0FC	-0.149792	0.86 (0.64 , 1.08)	0.207199
MetS	z_V4TGp	-0.167741	0.85 (0.59 , 1.11)	0.236617
MetS	z_V1CEp	0.144693	1.16 (0.93 , 1.39)	0.251071
MetS	z_L4PL	-0.137415	0.87 (0.65 , 1.09)	0.25624
MetS	z_H4PLp	0.138686	1.15 (0.92 , 1.38)	0.256785
MetS	z_L4CH	-0.137643	0.87 (0.64 , 1.1)	0.258143
MetS	z_V2CHTGR	-0.360737	0.7 (0.09 , 1.31)	0.27478
MetS	z_Acto	0.443423	1.56 (0.81 , 2.31)	0.27489
MetS	z_L0CE	0.126823	1.14 (0.92 , 1.36)	0.280593
MetS	z_V1CHTGR	0.115524	1.12 (0.91 , 1.33)	0.300483
MetS	z_H1CEp	0.108482	1.11 (0.9 , 1.32)	0.345711
MetS	z_X_HBA	0.194757	1.22 (0.83 , 1.61)	0.355537
MetS	z_V3CEp	-0.114498	0.89 (0.66 , 1.12)	0.356455
MetS	z_L0PL	0.0961581	1.1 (0.88 , 1.32)	0.417469
MetS	z_Acaa	0.187827	1.21 (0.75 , 1.67)	0.457997
MetS	z_Cra	0.078072	1.08 (0.88 , 1.28)	0.470044
MetS	z_L1AB	-0.0865714	0.92 (0.7 , 1.14)	0.470044
MetS	z_L1PN	-0.086547	0.92 (0.7 , 1.14)	0.470044
MetS	z_V3TGp	0.0891656	1.09 (0.86 , 1.32)	0.476633
MetS	z_V5CHp	0.0882166	1.09 (0.85 , 1.33)	0.498437
MetS	z_L4AB	0.0795332	1.08 (0.86 , 1.3)	0.502145
MetS	z_L4PN	0.0791531	1.08 (0.86 , 1.3)	0.502755
MetS	z_L4CEp	0.0783978	1.08 (0.84 , 1.32)	0.555962
MetS	z_H2A2	0.075572	1.08 (0.84 , 1.32)	0.555962
MetS	z_L6CHp	-0.0688582	0.93 (0.71 , 1.15)	0.571427
MetS	z_L4CE	-0.0685567	0.93 (0.71 , 1.15)	0.571984
MetS	z_L4LP	-0.0617856	0.94 (0.72 , 1.16)	0.606469
MetS	z_L2CEp	-0.0547501	0.95 (0.75 , 1.15)	0.611379
MetS	z_FA	-0.0642703	0.94 (0.71 , 1.17)	0.611567
MetS	z_L0CH	0.0575621	1.06 (0.84 , 1.28)	0.622755
MetS	z_L1LP	-0.0568603	0.94 (0.72 , 1.16)	0.622755
MetS	z_V2CHp	-0.0549189	0.95 (0.72 , 1.18)	0.658622
MetS	z_H1TG	0.0554287	1.06 (0.82 , 1.3)	0.661255
MetS	z_Leu	0.0444032	1.05 (0.83 , 1.27)	0.711665
MetS	z_H3A2	-0.0444123	0.96 (0.73 , 1.19)	0.714423
MetS	z_L5CHp	-0.0343792	0.97 (0.74 , 1.2)	0.776843
MetS	z_FisherR	0.0322	1.03 (0.8 , 1.26)	0.786736
MetS	z_Lactate	-0.00303685	1 (0.78 , 1.22)	0.984125
MetS	z_L2TG	0.00241934	1 (0.8 , 1.2)	0.984125
MetS	z_H0PLp	-0.000234578	1 (0.79 , 1.21)	0.998267

## Sheet: Table S5
Table S6. LASSO regression selected lipid metabolites and β coefficients.
	Metabolites	coeff_1se_lamda	P
Trunk fat/Weight	z_TGHCR	1.18293	0.0325
Trunk fat/Weight	z_TGPLR	0.0746495	0.3378
Trunk fat/Weight	z_V0PN	0.226149	0.2813
Trunk fat/Weight	z_L3PNp	-0.0756785	0.5944
Trunk fat/Weight	z_L6TG	0.123598	0.1319
Trunk fat/Weight	z_L3TGp	0.0784777	0.0108
